# Supplementary material for: The AAV9 receptor and its modification to improve in vivo lung gene transfer in mice
Source: JCI journal article supplement (doi:10.1172/jci57367), 2011-05-16
Supplement: sd1 [file 1]

MS 57367: The AAV9 receptor and its modification to improve in vivo lung gene transfer in mice

#### Supplemental Figure Legend

Figure S1. Deglycosylation studies of the AAV9 capsid. (A) AAV9 or (B) fetuin control protein was treated with various glycosidases (Enzymatic Protein Deglycosylation Kit- Sigma) then run on an SDS-PAGE gel and stained with SYPRO Ruby protein stain. (A) Lane 1- Benchmark ladder. Lane 2&3- no treatment. Lane 4- PNGase F. Lane 5- neuraminidase. Lane 6- neuraminidase+  $\beta$ -1,4-galactosidase+  $\beta$ -N-acetylglucosaminidase+ O-glycosidase. (B) Lane 1- Benchmark ladder. Lane 2- no treatment. Lane 3- PNGase F. Lane 4- neuraminidase. Lane 5- neuraminidase+  $\beta$ -1,4-galactosidase+  $\beta$ -N-acetylglucosaminidase+ O-glycosidase. There is no shift in the VP proteins of AAV9 after glycosidase treatment. All other bands observed are due to enzyme addition and are also observed in the corresponding lane for each treatment on the fetuin control gel.

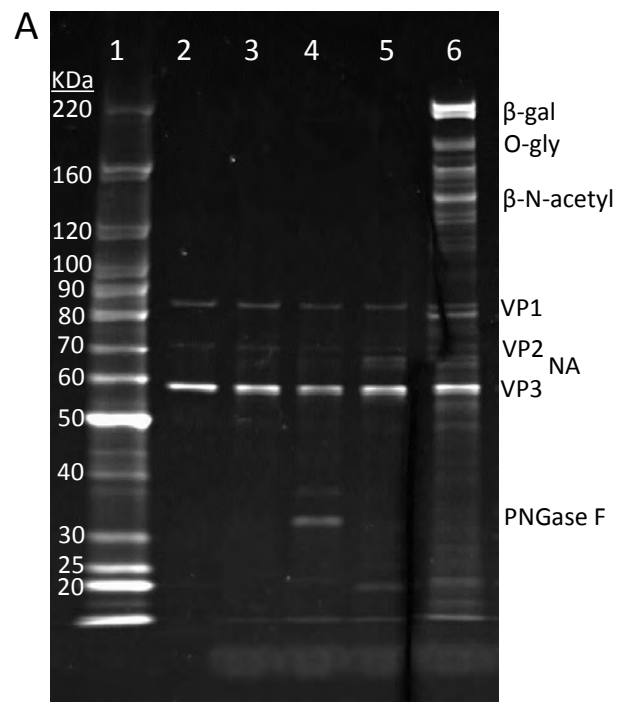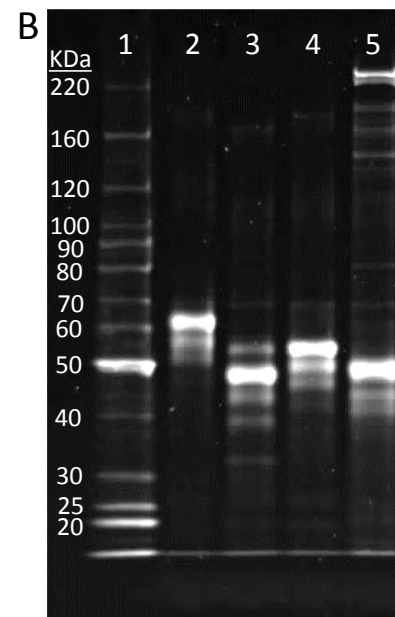

Fig. S1
